# Supplementary material
Source: Springer Nature journal article supplement (https://www.springermedizin.de/resource/supplementary/12885_2011_2912_MOESM13_ESM.pdf/9462310)

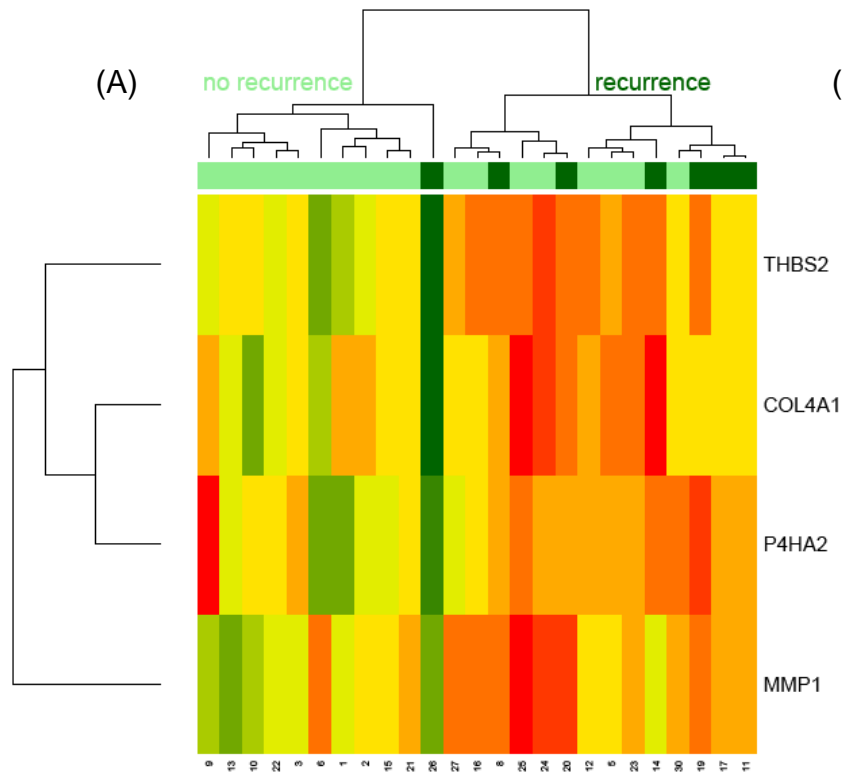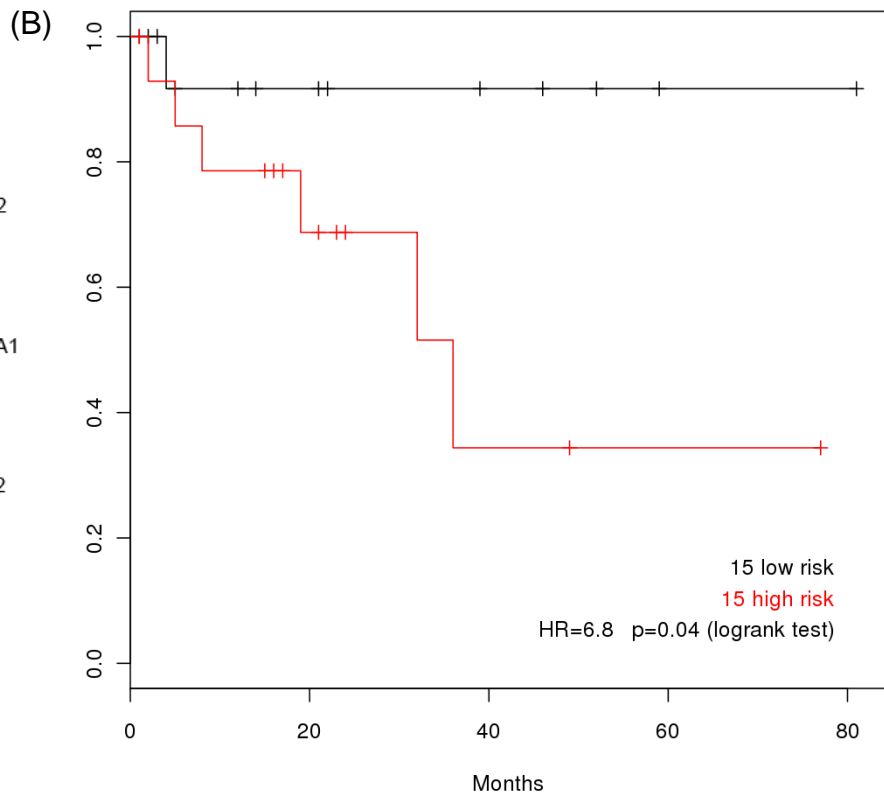

Supplement: MOESM13 [file 9462310]
